# Supplementary material for: An Agrobacterium-Mediated Transient Expression Method for Functional Assay of Genes Promoting Disease in Monocots
Source: MDPI journal article supplement (doi:10.3390/ijms24087636), 2023-04-21
Supplement: s1 [file s1]

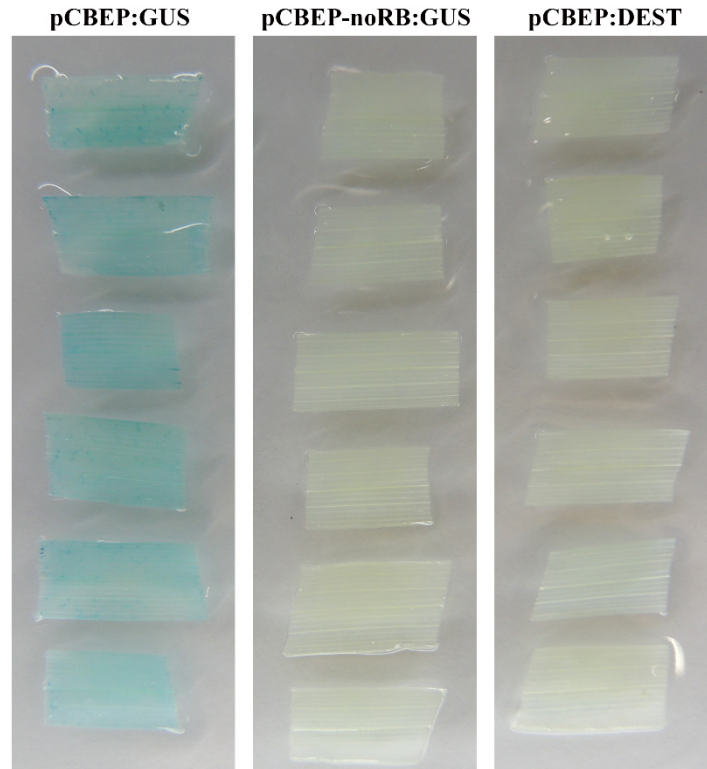

**Figure S1 The GUS expression was dependent on the transfer of T-DNA.** The right border sequences of pCBEP:GUS were deleted for transient expression. After Agro-infiltration, barley seedlings were incubated in growth room (24 °C, 16-h light/8-h darkness photoperiod) with 1 day of moisturizing treatment; samples were collected and analyzed at 4 dpi. The experiments were repeated three times, and similar results were observed.

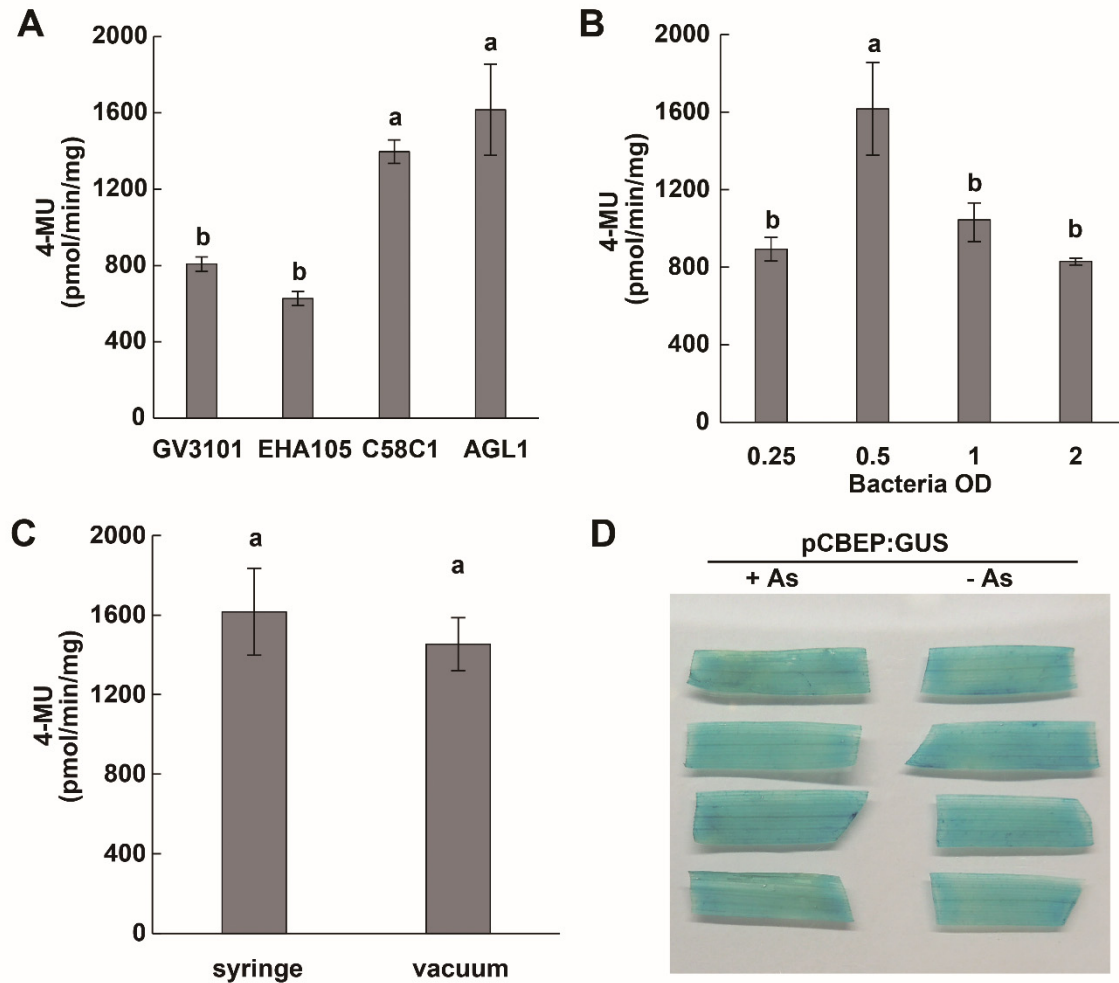

**Figure S2 Optimization of transient expression in barley leaves.** **A.** Quantification of GUS activity with diverse *Agrobacterium* strains (AGL1, C58C1, GV3101, and EHA105) harboring pCBEP:GUS. **B.** Different concentration (0.25-2 OD<sub>600</sub>) of AGL1. **C.** Agro-infiltration by syringe or vacuum. **D.** With or without acetosyringone (AS) in the infiltration buffer. AGL1 (0.5 OD<sub>600</sub>) harboring pCBEP:GUS was used for Agro-infiltration in the first leaf of barley with 1 day of moisturizing treatment; samples were collected and analyzed at 4 dpi. Data shown were means  $\pm$  SD (n = 6). Different letters indicate significant differences at P<0.01. The experiments were repeated three times, and similar results were observed.

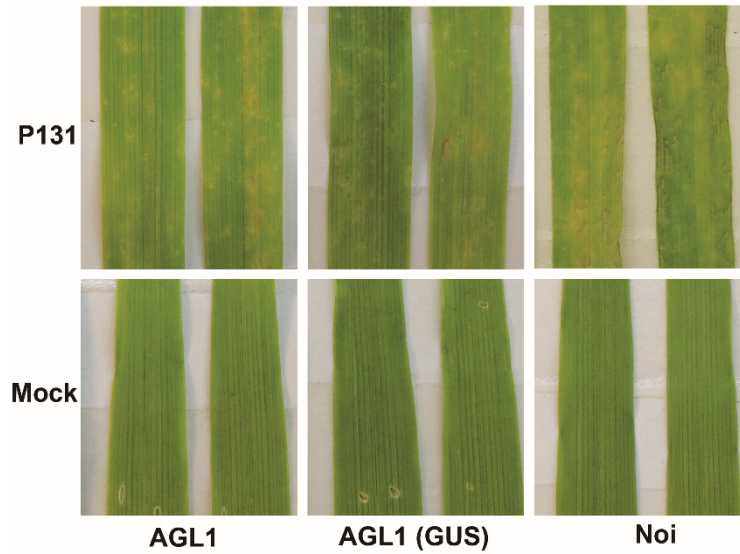

**Figure S3 Blast fungus can successfully infect Agro-infiltrated leaves of barley.** At 3 d after Agro-infiltration of the AGL1, AGL1 (GUS) or not (Noi), barley leaves were spray-inoculated with *M. oryzae* P131 ( $1 \times 10^5$  spores/mL) and incubated in a dark growth chamber at 25 °C for 24 h, followed by a 16-h light/8-h darkness photoperiod. The plants were sprayed with sterile deionized water as mock. Photographs were taken 3 days after fungal inoculation. The experiments were repeated three times, and similar results were observed.

**Table S1. Plasmids used in this study**

| Plasmids           | Relative properties or purpose                                                         | Source/References      |
|--------------------|----------------------------------------------------------------------------------------|------------------------|
| pIPKb002           | Constitutive binary expression vector, Spec <sup>R</sup>                               | Lu et al., 2016        |
| pER8:DEST          | Intermediate vector modified from pER8, inducible expression vector, Spec <sup>R</sup> | Fang et al., 2017      |
| pCBEP:DEST         | Intermediate vector modified from pER8 to pCBER DEST, Kana <sup>R</sup>                | Fang et al., 2017      |
| pINDEX2            | Inducible expression vector, Kana <sup>R</sup>                                         | Ouwerkerk et al., 2001 |
| pTA7002            | Inducible expression vector, Kana <sup>R</sup>                                         | Aoyama and Chua, 1997  |
| pCBDEST-transient  | Constitutive expression vector, Kana <sup>R</sup>                                      | Chang et al., 2019     |
| pIPKb002:GUS       | Transient expression of <i>GUS</i>                                                     | This study             |
| pER8:GUS           | Transient expression of <i>GUS</i>                                                     | This study             |
| pCBEP:GUS          | Transient expression of <i>GUS</i>                                                     | This study             |
| pCBEP:GUS-Flag     | Transient expression of <i>GUS</i> tagged Flag                                         | This study             |
| pCBEP-noRB:GUS     | Transient expression of <i>GUS</i> deleting the right border                           | This study             |
| pINDEX2:GUS        | Transient expression of <i>GUS</i>                                                     | This study             |
| pTA7002:GUS        | Transient expression of <i>GUS</i>                                                     | This study             |
| pCBDEST-GUS        | Transient expression of <i>GUS</i>                                                     | This study             |
| pCBEP:cLUC         | Transient expression of cLUC for Split-LUC assay                                       | This study             |
| pCBEP:nLUC         | Transient expression of nLUC for Split-LUC assay                                       | This study             |
| pCBEP:cLUC-OsbHLH6 | Transient expression of cLUC-OsbHLH6                                                   | This study             |
| pCBEP:cLUC-OsJAZ1  | Transient expression of cLUC-OsJAZ1                                                    | This study             |
| pCBEP:OsMYC2-nLUC  | Transient expression of OsMYC2-nLUC                                                    | This study             |
| pCBEP:OsNYC3       | Transient expression of OsNYC3                                                         | This study             |
| pCBEP:OsNUDX21     | Transient expression of OsNUDX21                                                       | This study             |
| pCBEP:OsMRS2-9     | Transient expression of OsMRS2-9                                                       | This study             |
| pCBEP:OsAk2        | Transient expression of OsAk2                                                          | This study             |
| pCBCS              | Constitutive binary expression vector, Kana <sup>R</sup>                               | Chen et al., 2021      |
| pCBCS:OsNYC3       | Stable overexpression of OsNYC3 for <i>Arabidopsis</i> transformation                  | This study             |
| pCBCS:OsNUDX21     | Stable overexpression of OsNUDX21                                                      | This study             |
| pCBCS:OsMRS2-9     | Stable overexpression of OsMRS2-9                                                      | This study             |
| pCBCS:OsAk2        | Stable overexpression of OsAk2                                                         | This study             |

<sup>R</sup>resistance: Spec, spectinomycin; Kana, kanamycin.

**Table S2. Primers used in this study**

| Primers            | Sequence 5'-3'                                   | Purpose                                                                                                  |
|--------------------|--------------------------------------------------|----------------------------------------------------------------------------------------------------------|
| GUS-attb-F         | aaaaagcaggctATGTTACGTCCTGTAGAAACCCC              | Cloning of <i>GUS</i>                                                                                    |
| GUS-attb-R         | agaaagctgggtTTATTGTTTGCCTCCCTGCTG                |                                                                                                          |
| DEST-F             | gcctcgacacgtgtaaGACTCTAGCCTCGAGAATCAACA          | Cloning of the <i>attR</i> cassette                                                                      |
| DEST-R             | agatgtacatactegaGATCGACTAGTATCAACCACTTTGT        |                                                                                                          |
| pCBEP noRB-F       | TGGCGGCCGCTCTAGAACTA                             | Cloning of pCBEP:GUS without right border for self-ligated                                               |
| pCBEP noRB-R       | AATCCGATCCGCACATGAGG                             |                                                                                                          |
| attb-c/nLUC-sfiI-F | aaaaagcaggctTACTATTCTAGTCGACCTGCAG               | Cloning of cLUC and nLUC containing two different SfiI sites to construct pCBEP:cLUC and pCBEP:nLUC      |
| attb-c/nLUC-sfiI-R | agaaagctgggtCTGGTGATTTTTGCGGACTCTA               |                                                                                                          |
| OsMYC2-sfiI-F      | attaacaaggccattacggccATGTGGGTTTTGTTATCTCCTCTCCTC | Cloning of <i>OsMYC2</i> from cDNA of rice (Nipponbare) to construct pCBEP:OsMYC2-nLUC                   |
| OsMYC2-sfiI-R      | aactgattggccgagggcgccccCTCGGCGATGCGGGTGTAGA      |                                                                                                          |
| OsHHLH6-sfiI-F     | attaacaaggccattacggccATGGACGCCGAGATGGCCA         | Cloning of <i>OsHHLH6</i> from cDNA of rice (Nipponbare) to construct pCBEP:cLUC-OsHHLH6                 |
| OsHHLH6-sfiI-R     | aactgattggccgagggcgccccGCTCAACGGACTGCCGGT        |                                                                                                          |
| OsJAZ1-sfiI-F      | attaacaaggccattacggccATGGATCTGTTGGAGAAGAA        | Cloning of <i>OsJAZ1</i> from cDNA of rice (Nipponbare) to construct pCBEP:cLUC-OsJAZ1                   |
| OsJAZ1-sfiI-R      | aactgattggccgagggcgccccCTGGGCCTTGCCCTCAGC        |                                                                                                          |
| attb-Flag-sfiI-F   | aaaaagcaggctTACTATTCTAGTCGACCTGCAG               | Cloning of Flag containing two different <i>SfiI</i> sites to construct pCBEP:Flag                       |
| attb-Flag-sfiI-R   | agaaagctgggtCTGGTGATTTTTGCGGACTCTA               |                                                                                                          |
| SfiI-OsNYC3-F      | attaacaaggccattacggccGCCACTAGTGTGGCCATGGAAGT     | Cloning of <i>OsNYC3</i> from cDNA of rice (Nipponbare) to construct pCBEP:OsNYC3 and pCBCS:OsNYC3       |
| SfiI-OsNYC3-R      | aactgattggccgagggcgccccTCTAGATATTACCCATGTGTTG    |                                                                                                          |
| SfiI-OsNUDX21-F    | attaacaaggccattacggccACAATCAAAGATTTCGATGGCCG     | Cloning of <i>OsNUDX21</i> from cDNA of rice (Nipponbare) to construct pCBEP:OsNUDX21 and pCBCS:OsNUDX21 |
| SfiI-OsNUDX21-R    | aactgattggccgagggcgccccCAGCGCAGACTGCAGCTTGTTG    |                                                                                                          |
| SfiI-OsMRS2-C-F    | attaacaaggccattacggccGACCTCGACGGCCATGGACCAC      | Cloning of <i>OsMRS2-C</i> from cDNA of rice (Nipponbare) to construct pCBEP:OsMRS2-C and pCBCS:OsMRS2-C |
| SfiI-OsMRS2-C-R    | aactgattggccgagggcgccccCAAGGGGAAAAACCTTCTCTTCTTG |                                                                                                          |
| SfiI-OsAdK2-F      | attaacaaggccattacggccGTTAATATGGTGAAGGAACGCC      | Cloning of <i>OsAdK2</i> from cDNA of rice (Nipponbare) to construct pCBEP:OsAdK2 and pCBCS:OsAdK2       |
| SfiI-OsAdK2-R      | aactgattggccgagggcgccccTGCGCTAGCCACCATTCTGT      |                                                                                                          |

|                    |                           |
|--------------------|---------------------------|
| MGActin-qF         | GGTCTTGAGAGCGGTGGTATCCATG |
| MGActin-qR         | TGCCAGGGCAGTGATCTCCTTC    |
| Barley actin F     | CCTCGGCACACTGGTGTCATGGTA  |
| Barley actin R     | AAGGGGCCTCAGTGAGCAACACA   |
| UBQ10-F            | GGCCTTGTATAATCCCTGATGAAT  |
| UBQ10-R            | AAAGAGATAACAGGAACGGAAACA  |
| $\beta$ -tubulin-F | CGGTCTCAAGATGTCCTCCAC     |
| $\beta$ -tubulin-R | AGAAAGCCTTGCGACGGAACA     |
| R-Actin1-F         | TGGCATTGCTGACAGGATGAGC    |
| R-Actin1-R         | CGTCGTACTCAGCCTTGGCAATC   |
| OsNYC3-qF          | ATTACAACCATGGGCGGAGG      |
| OsNYC3-qR          | TCCCAGAGAGTTCCCCACAA      |
| OsNUDX21-qF        | CATGATGTTCCCCAAGGGCG      |
| OsNUDX21-qR        | TCTTGTAGTACCAGCAGCCG      |
| OsMRS2-C-qF        | ACATTTCGTGGTGGCCATCTT     |
| OsMRS2-C-qR        | GTCCATTTCGAACGCATGTGG     |
| OsAdK2-qF          | AAGGTCATGATAGCAGGGGC      |
| OsAdK2-qR          | AGCTCGCTTCCCATTCTCAC      |

---

*Magnaporthe oryzae* Actin gene for qPCR

Barley HvActin gene for qPCR

*Arabidopsis UBQ10* gene for qPCR

*Colletotrichum higginsianum*  $\beta$ -tubulin gene for qPCR

Rice *OsActin* gene for qPCR

Rice *OsNYC3* gene for qPCR

Rice *OsNUDX21* gene for qPCR

Rice *OsMRS2-C* gene for qPCR

Rice *OsAdK2* gene for qPCR
